# Supplementary material for: How Rainforest Conversion to Agricultural Systems in Sumatra (Indonesia) Affects Active Soil Bacterial Communities
Source: Front Microbiol. 2018 Oct 10;9:2381. doi: 10.3389/fmicb.2018.02381 (PMC6191527; doi:10.3389/fmicb.2018.02381)
Supplement: Supplementary file 3 [file Table_3.XLSX]

## Sheet: Tabelle1
Table S3.PERMANOVA results for community composition analysis. Analysis was performed with Supplementary Table S2 in R via the “vegan” and “RVAideMemoire” packages.
> adonis(veg ~ envData$Transformation_system_Landscape)
Call:
adonis(formula = veg ~ envData$Transformation_system_Landscape)
Permutation: free
Number of permutations: 999
Terms added sequentially (first to last)
envData$Transformation_system_Landscape	Df	SumsofSqs	MeanSqs	F.Model	R2	Pr(>F)
Residuals	7	34918	0.49883	3.1768	0.20172	0.001	***
Total	88	138181	0.15702		0.79828
---	95	173099			1
Signif. codes: 0 ‘***’ 0.001 ‘**’ 0.01 ‘*’ 0.05 ‘.’ 0.1 ‘ ’ 1
> pairwise.perm.manova(veg,envData$Transformation_system_Landscape, p.method = "bonferroni")
Pairwise comparisons using permutation MANOVAs on a distance matrix
data: veg by envData$Transformation_system_Landscape
999 permutations
	jungle rubber Bukit	jungle rubber Harapan	oil palm Bukit
jungle rubber Harapan	0.196	-	-
oil palm Bukit	0.028	0.056	-
oil palm Harapan	0.028	0.028	1000
rainforest Bukit	0.028	0.028	0.028
rainforest Harapan	0.028	0.028	0.028
rubber Bukit	0.168	0.028	0.028
rubber Harapan	0.028	0.028	0.084
	oil palm Harapan	rainforest Bukit	rainforest Harapan	rubber Bukit
jungle rubber Harapan	-	-	-	-
oil palm Bukit	-	-	-	-
oil palm Harapan	-	-	-	-
rainforest Bukit	0.028	-	-	-
rainforest Harapan	0.028	0.028	-	-
rubber Bukit	0.028	0.028	0.028	-
rubber Harapan	0.084	0.028	0.028	0.084
P value adjustment method: bonferroni
